# Supplementary material
Source: Royal Society of Chemistry journal article supplement (doi:10.1039/d6se00140h)
Supplement: d6se00140h1.pdf [file d6se00140h1.pdf]

## Functional Group Effects on the Electrocatalytic Activity of Iron Phthalocyanine for ORR, OER, and HER in Aqueous Medium: Insights from Density Functional Theory

Angappan Kausalya, Senthilkumar Lakshmi<sup>†</sup>\*

Department of Physics, Bharathiar University, Coimbatore 641046, Tamil Nadu, India

[\*] Corresponding author: Senthilkumar Lakshmi<sup>†</sup> Email: [lsenthilkumar@buc.edu.in](mailto:lsenthilkumar@buc.edu.in)

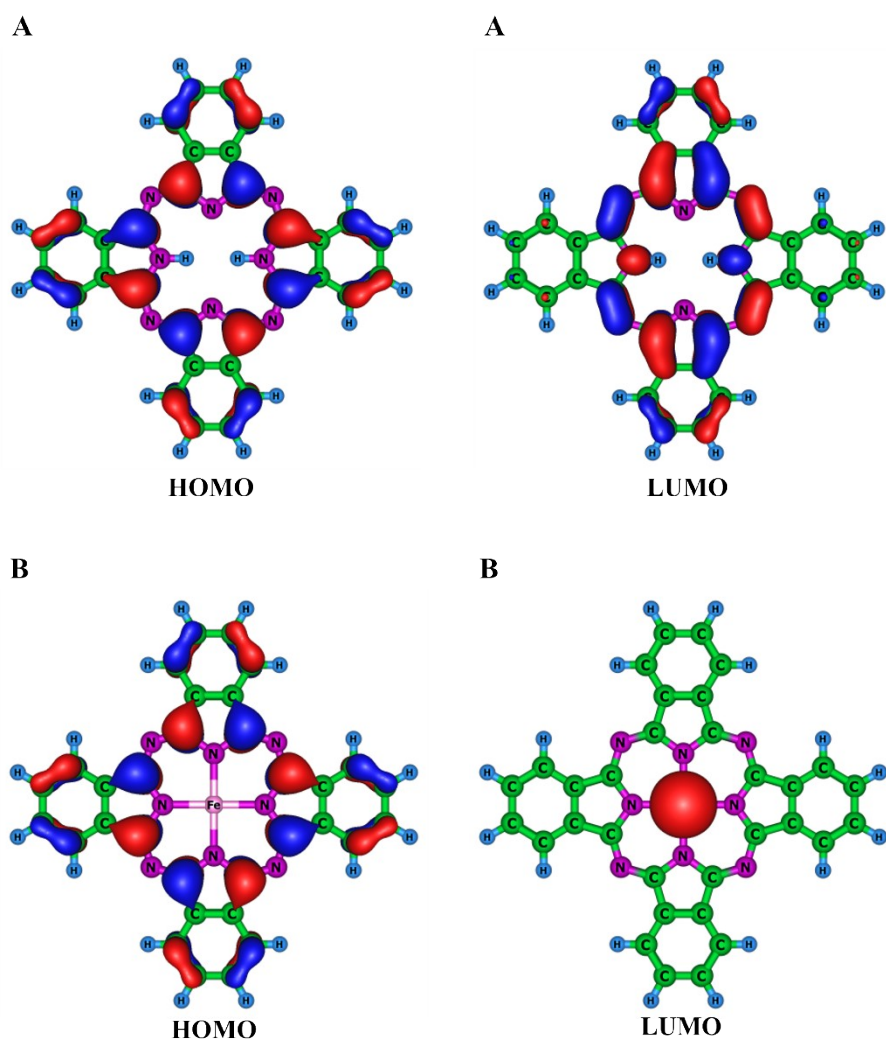

C

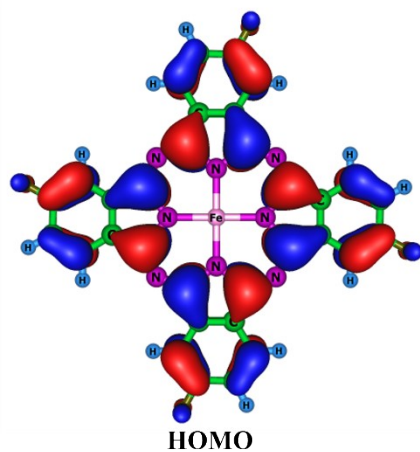

C

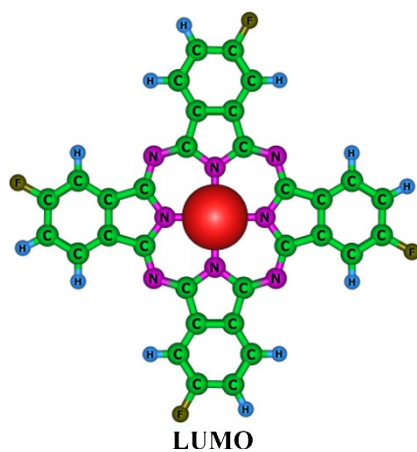

D

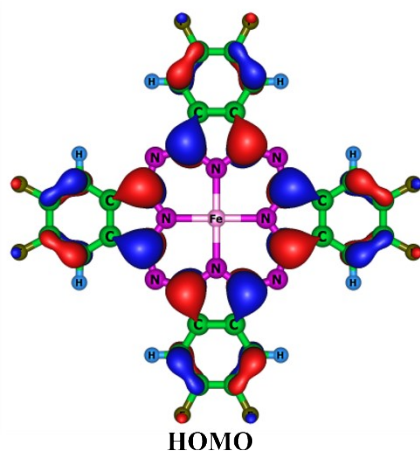

D

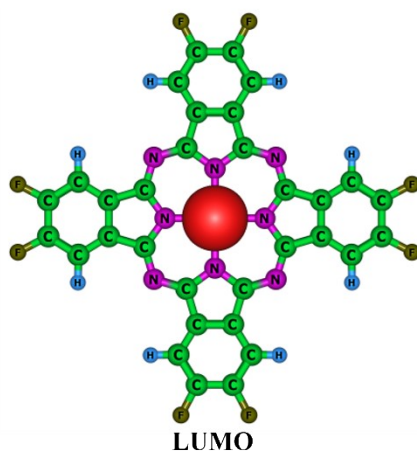

E

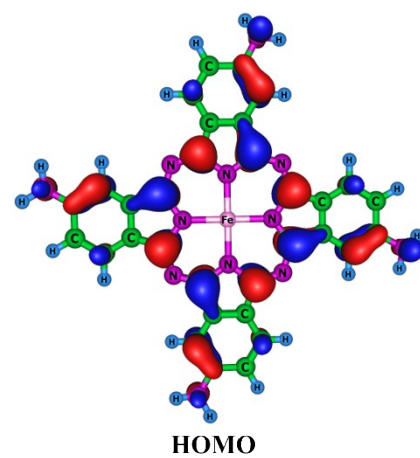

E

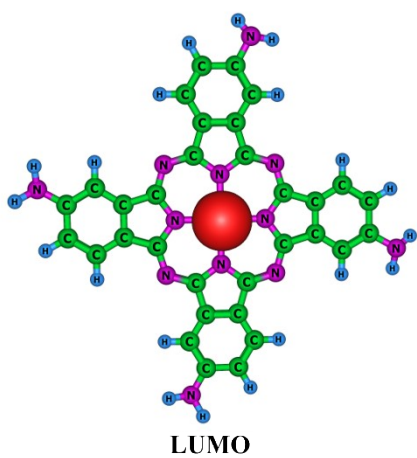

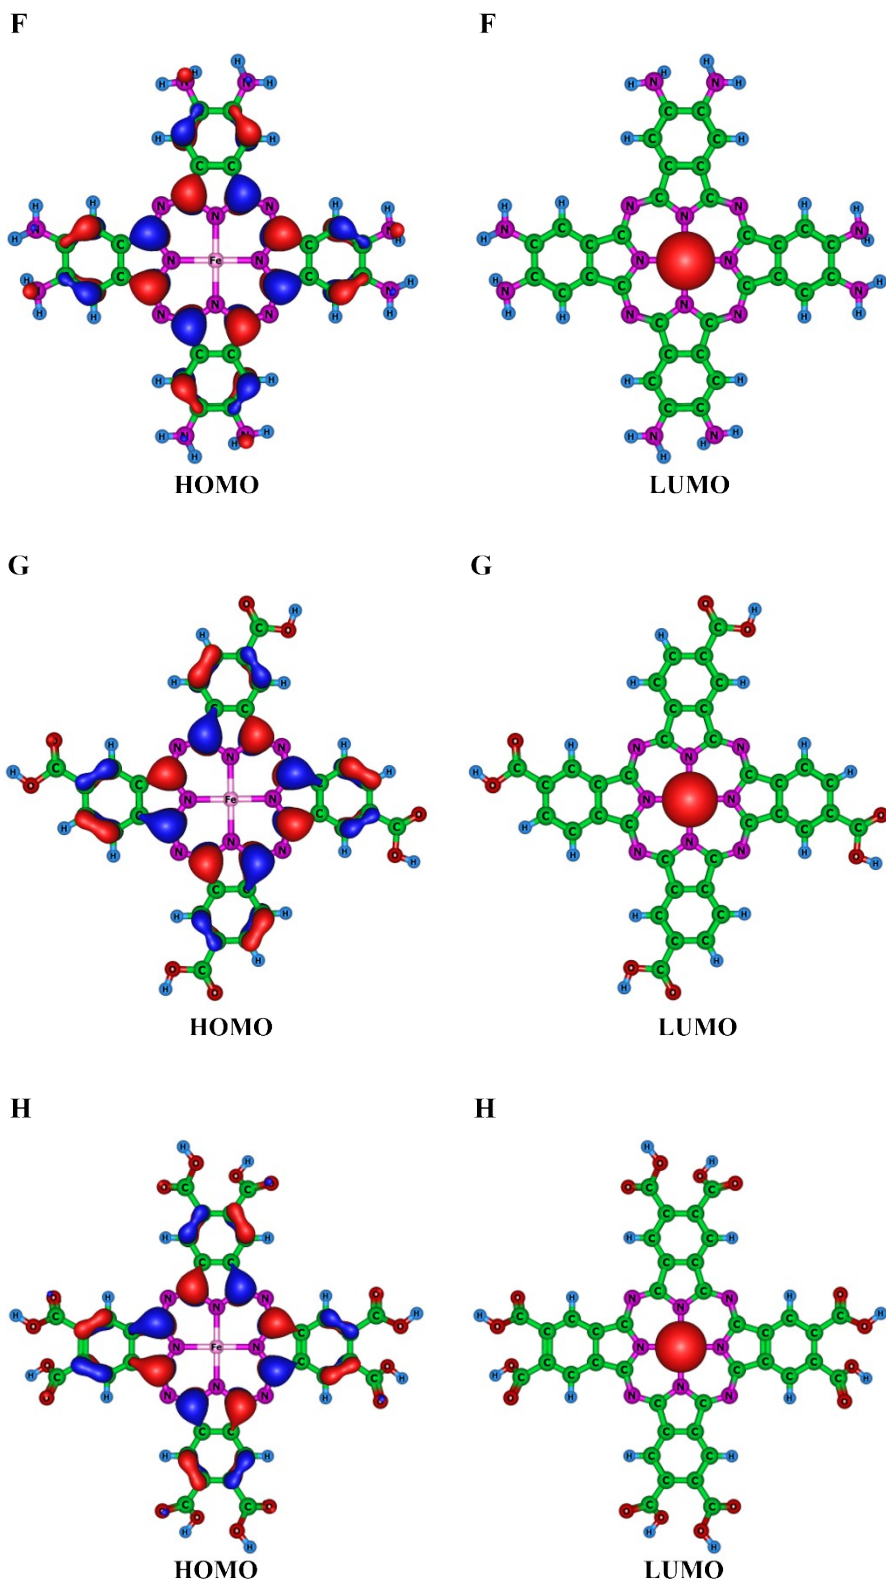

**Fig. S1.** HOMO-LUMO plots of **A)** Pp **B)** FePc **C)** FePc(F)<sub>4</sub> **D)** FePc(F)<sub>8</sub> **E)** FePc(NH<sub>2</sub>)<sub>4</sub> **F)** FePc(NH<sub>2</sub>)<sub>8</sub> **G)** FePc(COOH)<sub>4</sub> and **H)** FePc(COOH)<sub>8</sub>.

**Table S1.** The formation energy ( $E_f$ ), binding energy per atom ( $E_b$ ), HOMO energy ( $E_{\text{HOMO}}$ ), LUMO energy ( $E_{\text{LUMO}}$ ), and  $E_{\text{HOMO-LUMO}}$  gap of the catalytic surfaces / eV (in vacuum).

| Structure                               | $E_f$ | $E_b$ | $E_{\text{HOMO}}$ | $E_{\text{LUMO}}$ | $E_{\text{HOMO-LUMO}}$ gap |
|-----------------------------------------|-------|-------|-------------------|-------------------|----------------------------|
| <b>Pc</b>                               | -     | -6.76 | -4.98             | -2.84             | 2.15                       |
| <b>FePc</b>                             | -5.97 | -6.91 | -4.93             | -3.37             | 1.56                       |
| <b>FePc(F)<sub>4</sub></b>              | -5.91 | -6.95 | -5.20             | -3.63             | 1.57                       |
| <b>FePc(F)<sub>8</sub></b>              | -5.84 | -6.98 | -5.46             | -3.86             | 1.60                       |
| <b>FePc(NH<sub>2</sub>)<sub>4</sub></b> | -9.30 | -6.67 | -4.32             | -2.89             | 1.43                       |
| <b>FePc(NH<sub>2</sub>)<sub>8</sub></b> | -9.23 | -6.48 | -4.25             | -2.84             | 1.41                       |
| <b>FePc(COOH)<sub>4</sub></b>           | -9.28 | -7.09 | -5.43             | -3.85             | 1.59                       |
| <b>FePc(COOH)<sub>8</sub></b>           | -8.98 | -7.19 | -5.73             | -4.10             | 1.63                       |

**A**

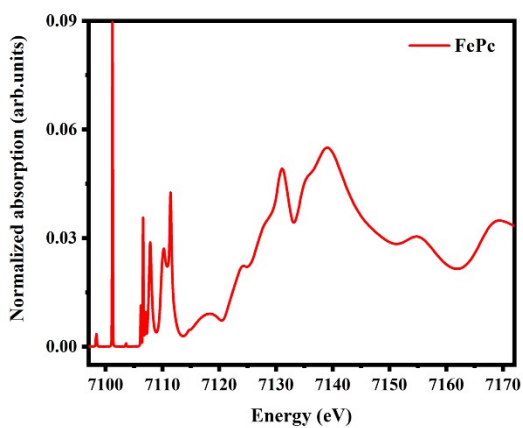

**B**

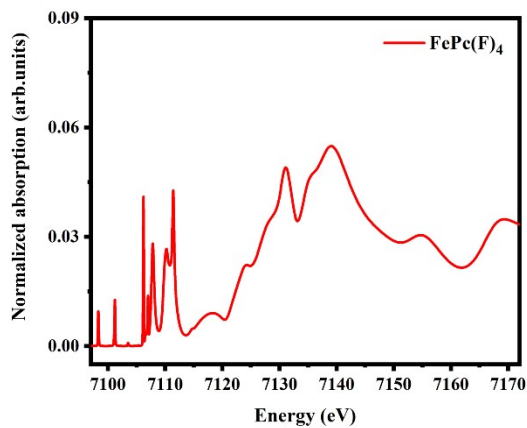

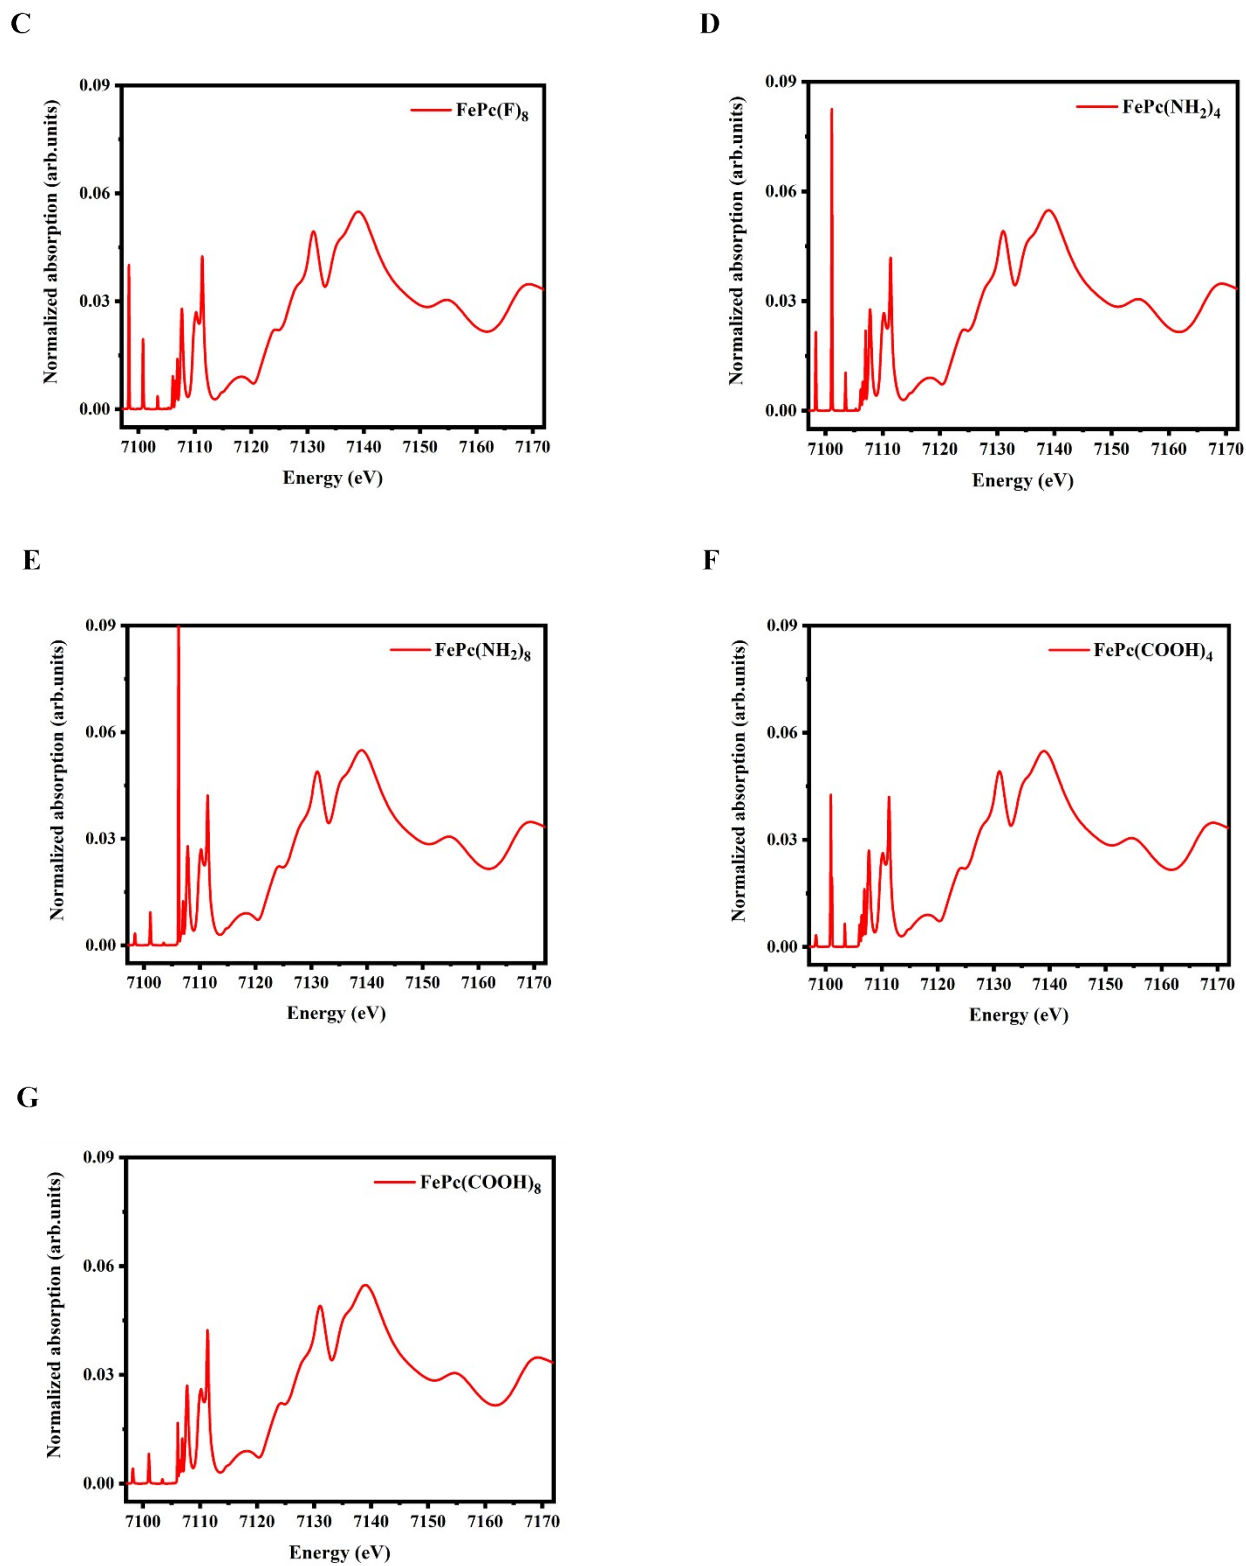

**Fig. S2.** Full range Fe K-edge XAS plots of **A)** FePc, **B)** FePc(F)<sub>4</sub>, **C)** FePc(F)<sub>8</sub>, **D)** FePc(NH<sub>2</sub>)<sub>4</sub>, **E)** FePc(NH<sub>2</sub>)<sub>8</sub>, **F)** FePc(COOH)<sub>4</sub>, and **G)** FePc(COOH)<sub>8</sub> in vacuum.

1

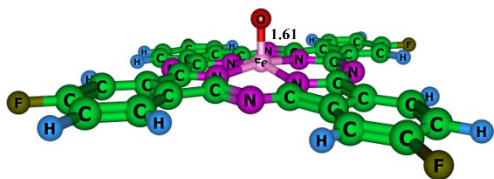

2

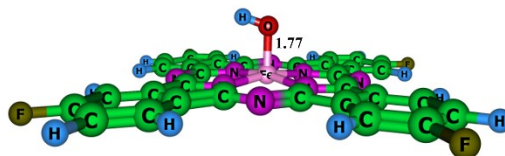

3

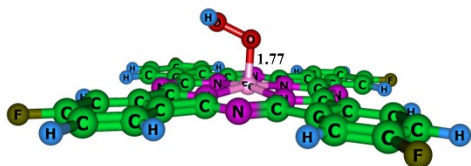

4

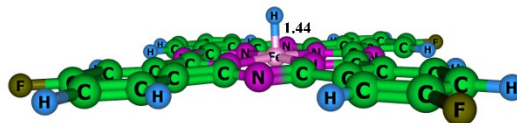

5

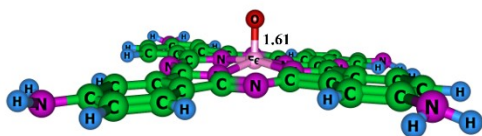

6

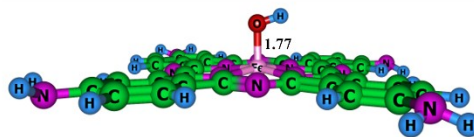

7

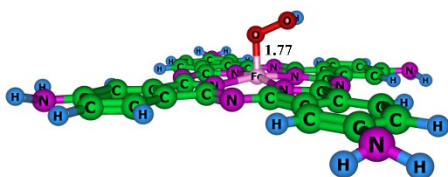

8

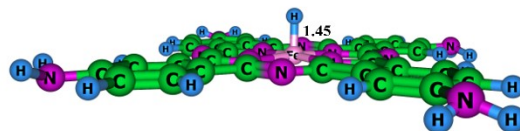

9

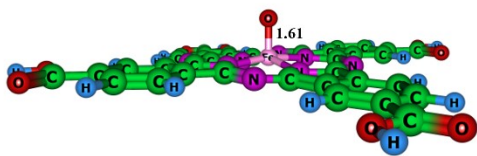

10

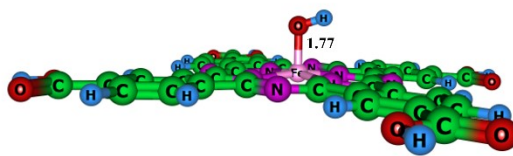

11

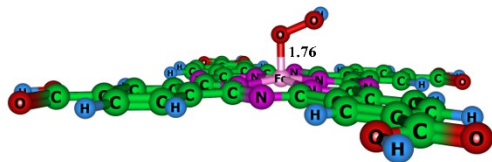

12

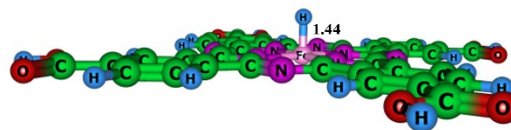

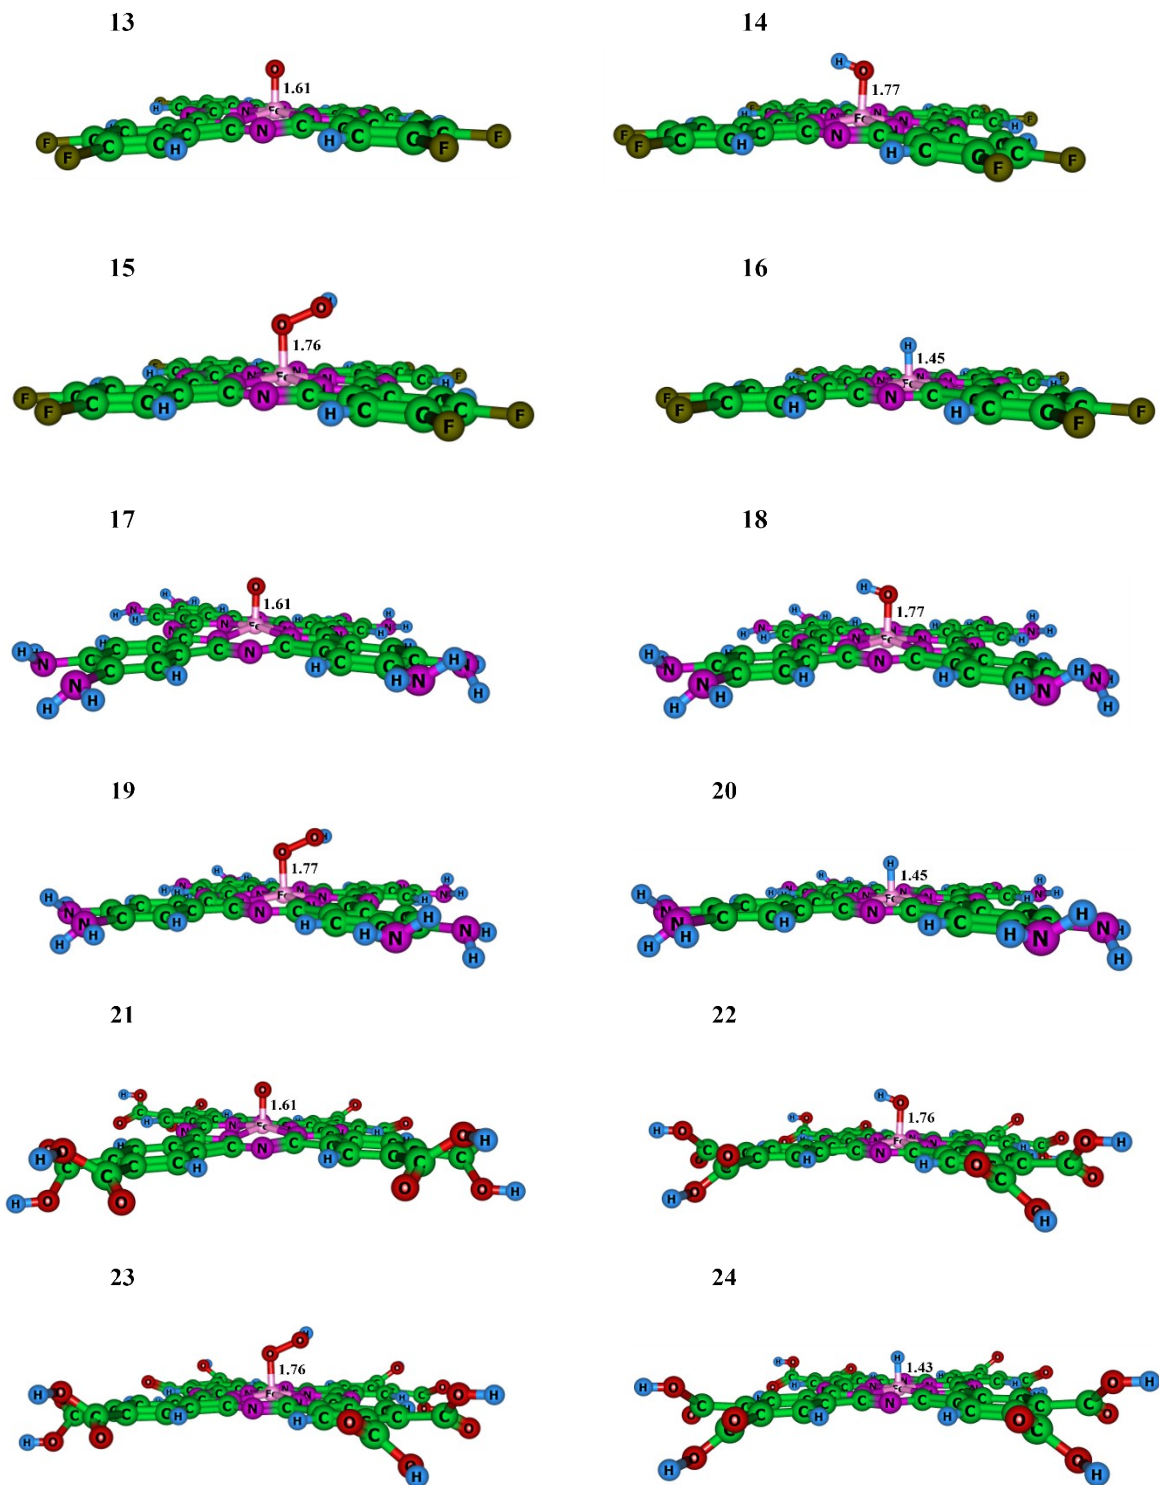

**Fig. S3.** Optimized geometries of adsorption intermediates on M-sites 1) O-FePc(F)<sub>4</sub> 2) OH-FePc(F)<sub>4</sub> 3) OOH-FePc(F)<sub>4</sub> 4) H-FePc(F)<sub>4</sub> 5) O-FePc(NH<sub>2</sub>)<sub>4</sub> 6) OH-FePc(NH<sub>2</sub>)<sub>4</sub> 7) OOH-FePc(NH<sub>2</sub>)<sub>4</sub> 8) H-FePc(NH<sub>2</sub>)<sub>4</sub> 9) O-FePc(COOH)<sub>4</sub> 10) OH-FePc(COOH)<sub>4</sub> 11) OOH-

$\text{FePc}(\text{COOH})_4$  **12**)  $\text{H-FePc}(\text{COOH})_4$  **13**)  $\text{O-FePc}(\text{F})_8$  **14**)  $\text{OH-FePc}(\text{F})_8$  **15**)  $\text{OOH-FePc}(\text{F})_8$  **16**)  $\text{H-FePc}(\text{F})_8$  **17**)  $\text{O-FePc}(\text{NH}_2)_8$  **18**)  $\text{OH-FePc}(\text{NH}_2)_8$  **19**)  $\text{OOH-FePc}(\text{NH}_2)_8$  **20**)  $\text{H-FePc}(\text{NH}_2)_8$  **21**)  $\text{O-FePc}(\text{COOH})_8$  **22**)  $\text{OH-FePc}(\text{COOH})_8$  **23**)  $\text{OOH-FePc}(\text{COOH})_8$  **24**)  $\text{H-FePc}(\text{COOH})_8$ .

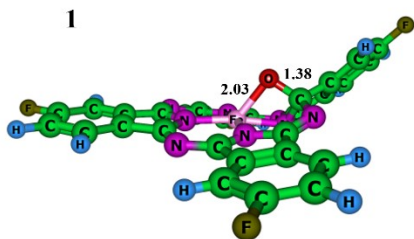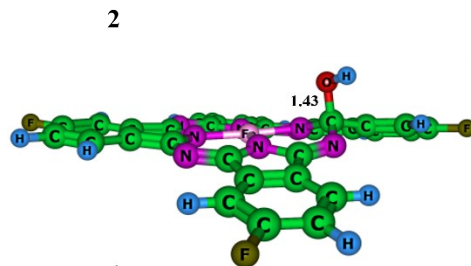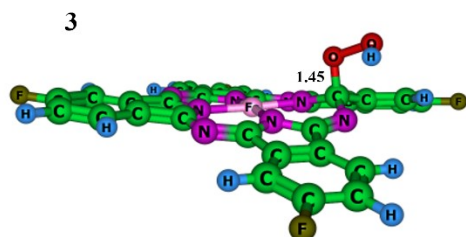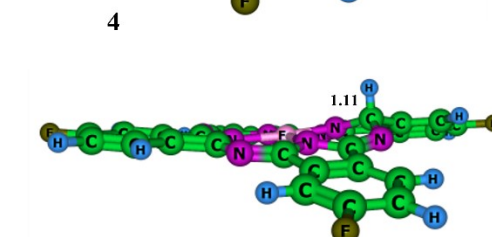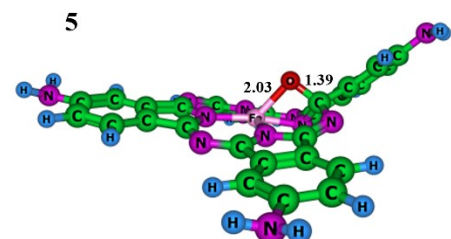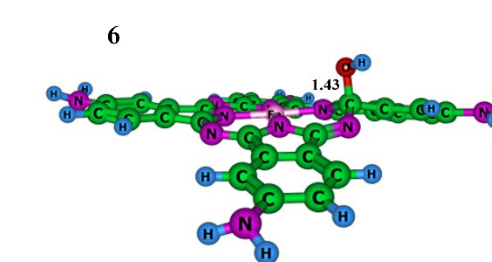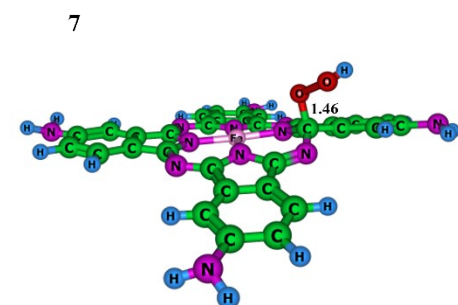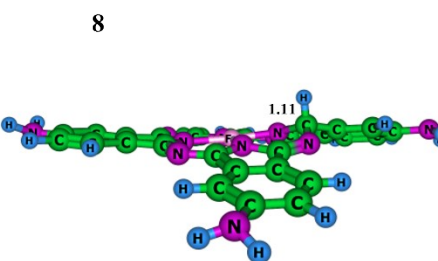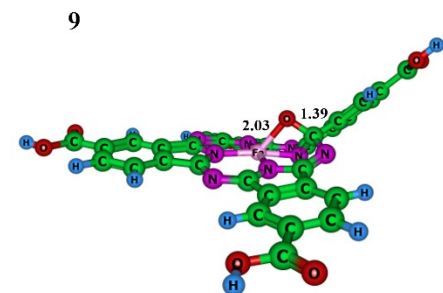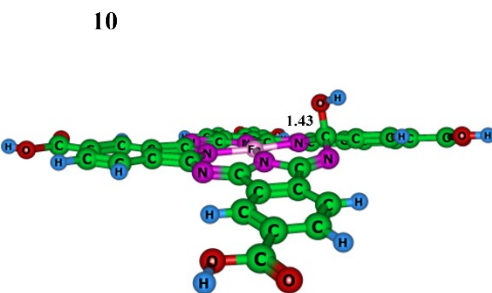

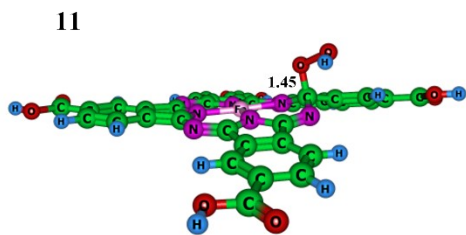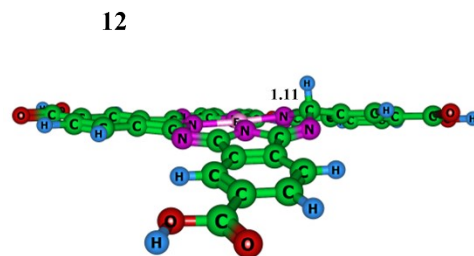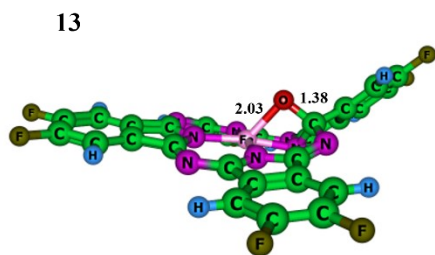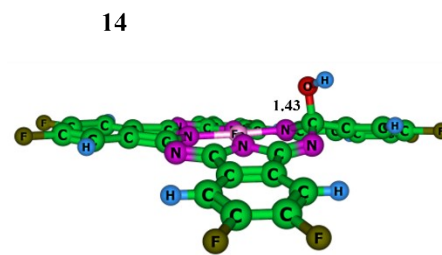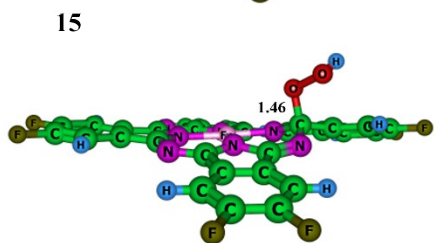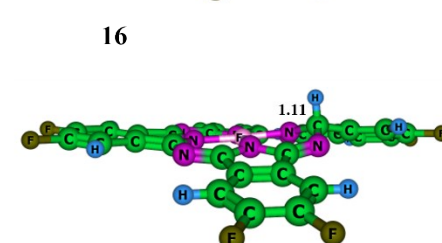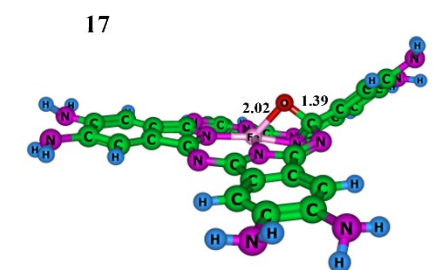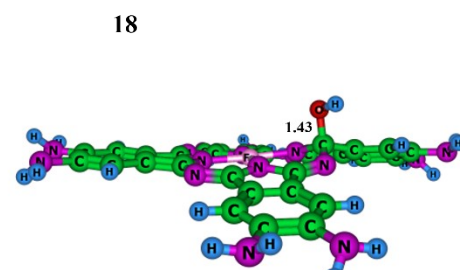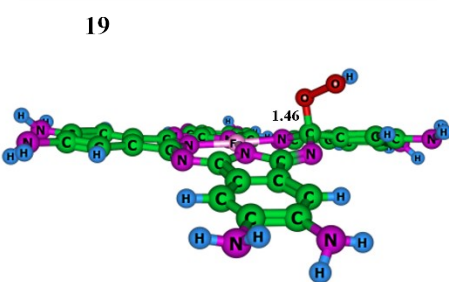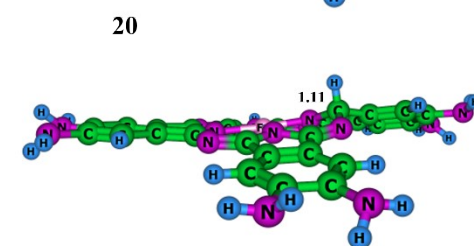

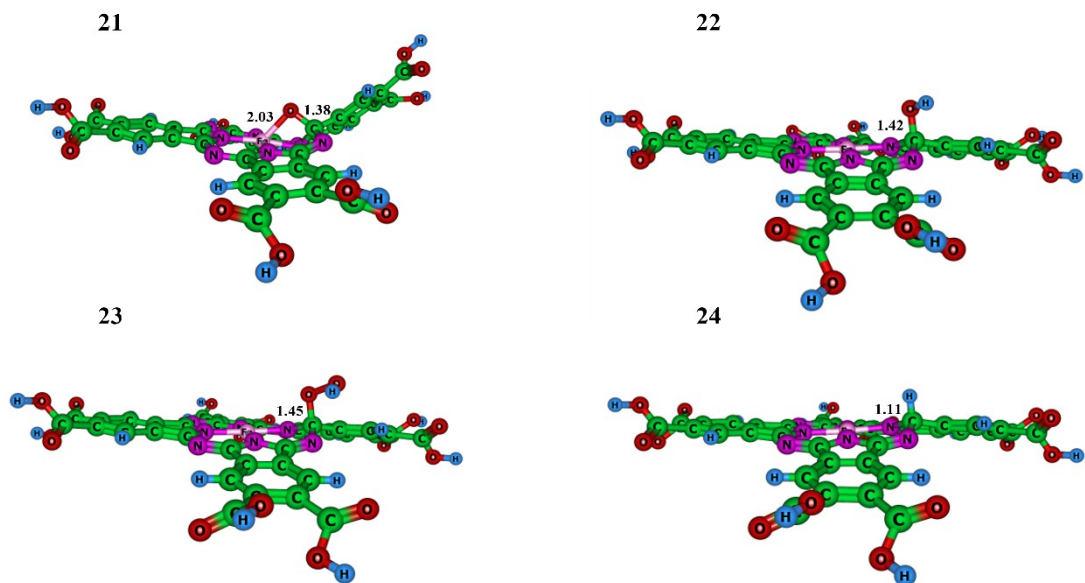

**Fig. S4.** Optimized geometries of adsorption intermediates on C-sites **1)** O-FePc(F)<sub>4</sub> **2)** OH-FePc(F)<sub>4</sub> **3)** OOH-FePc(F)<sub>4</sub> **4)** H-FePc(F)<sub>4</sub> **5)** O-FePc(NH<sub>2</sub>)<sub>4</sub> **6)** OH-FePc(NH<sub>2</sub>)<sub>4</sub> **7)** OOH-FePc(NH<sub>2</sub>)<sub>4</sub> **8)** H-FePc(NH<sub>2</sub>)<sub>4</sub> **9)** O-FePc(COOH)<sub>4</sub> **10)** OH-FePc(COOH)<sub>4</sub> **11)** OOH-FePc(COOH)<sub>4</sub> **12)** H-FePc(COOH)<sub>4</sub> **13)** O-FePc(F)<sub>8</sub> **14)** OH-FePc(F)<sub>8</sub> **15)** OOH-FePc(F)<sub>8</sub> **16)** H-FePc(F)<sub>8</sub> **17)** O-FePc(NH<sub>2</sub>)<sub>8</sub> **18)** OH-FePc(NH<sub>2</sub>)<sub>8</sub> **19)** OOH-FePc(NH<sub>2</sub>)<sub>8</sub> **20)** H-FePc(NH<sub>2</sub>)<sub>8</sub> **21)** O-FePc(COOH)<sub>8</sub> **22)** OH-FePc(COOH)<sub>8</sub> **23)** OOH-FePc(COOH)<sub>8</sub> **24)** H-FePc(COOH)<sub>8</sub>.

1

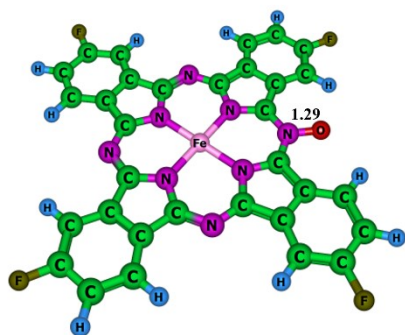

2

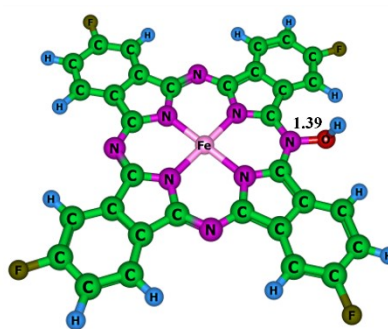

3

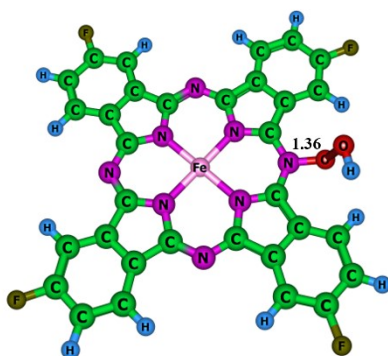

4

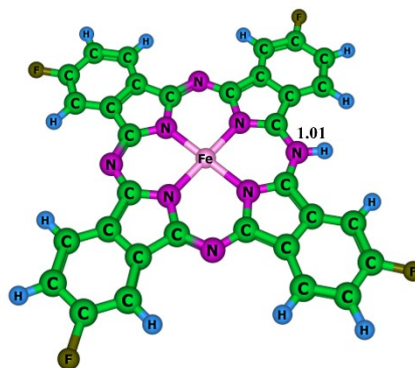

5

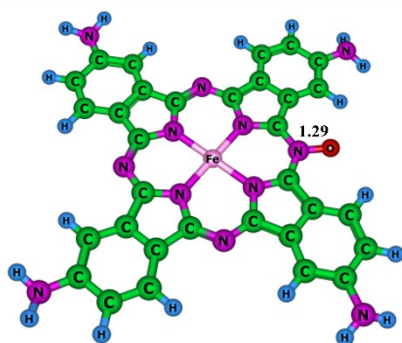

6

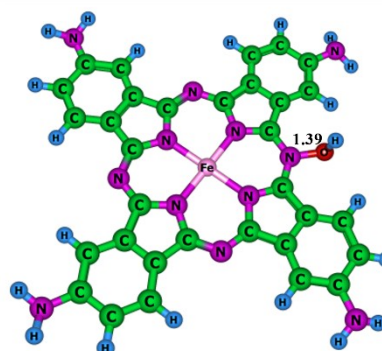

7

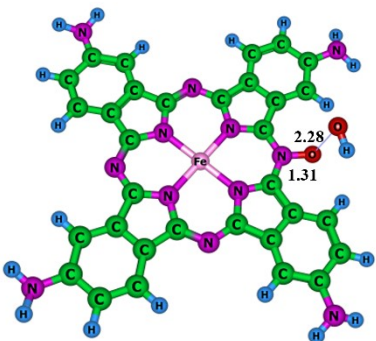

8

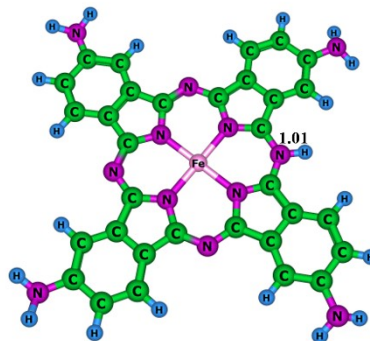

9

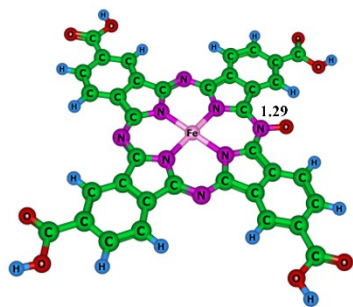

10

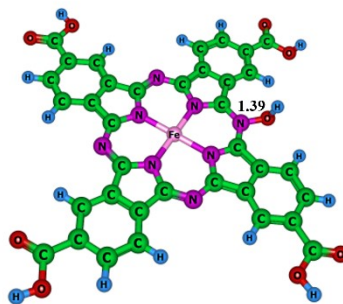

11

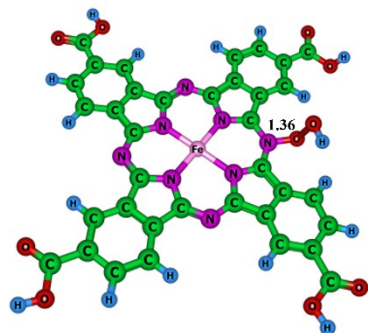

12

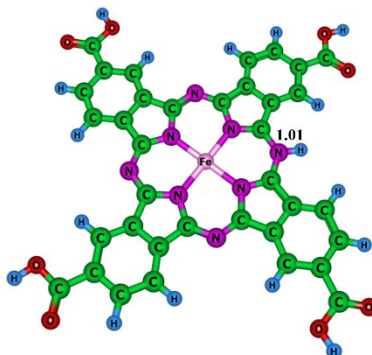

13

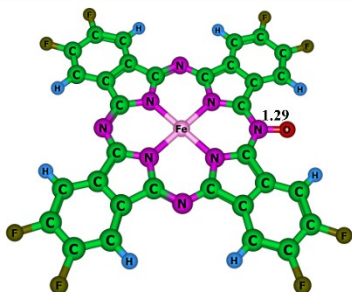

14

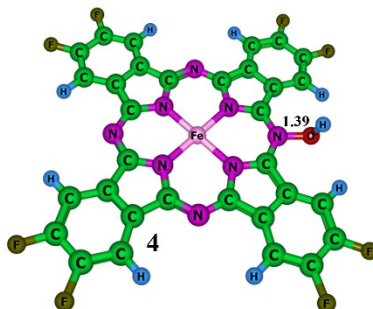

15

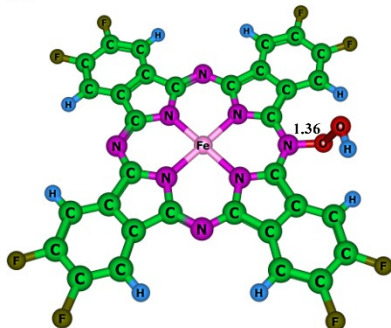

16

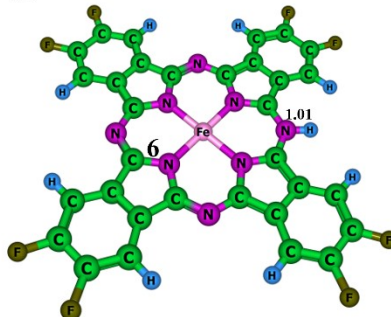

17

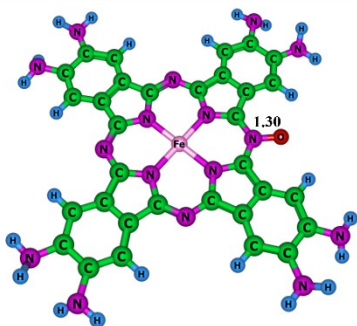

18

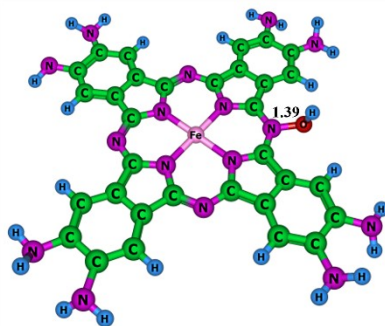

19

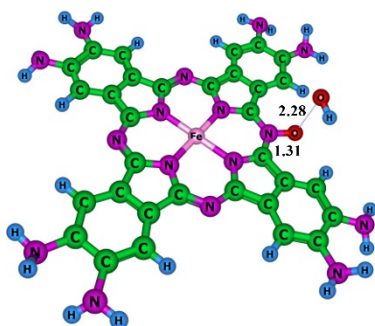

20

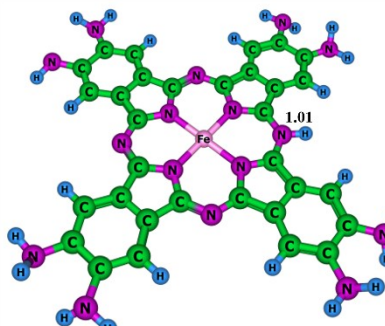

21

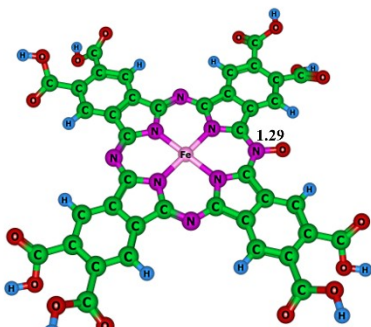

22

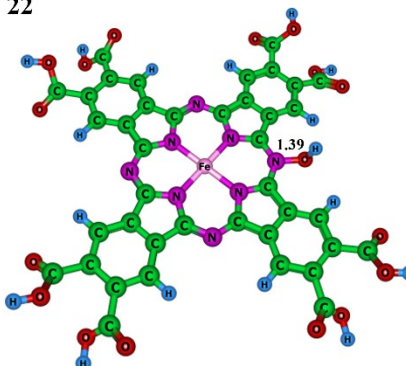

23

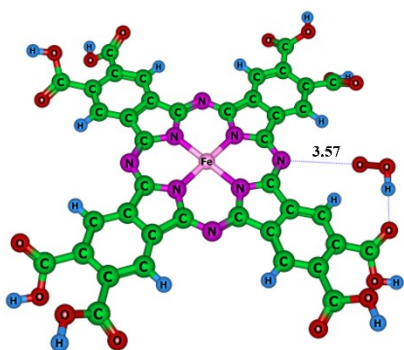

24

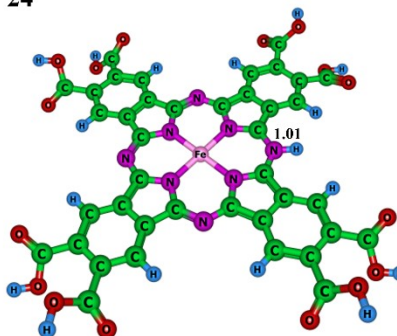

**Fig. S5.** Optimized geometries of adsorption intermediates on N-sites 1) O-FePc(F)<sub>4</sub> 2) OH-FePc(F)<sub>4</sub> 3) OOH-FePc(F)<sub>4</sub> 4) H-FePc(F)<sub>4</sub> 5) O-FePc(NH<sub>2</sub>)<sub>4</sub> 6) OH-FePc(NH<sub>2</sub>)<sub>4</sub> 7) OOH-

FePc(NH<sub>2</sub>)<sub>4</sub> **8**) H-FePc(NH<sub>2</sub>)<sub>4</sub> **9**) O-FePc(COOH)<sub>4</sub> **10**) OH-FePc(COOH)<sub>4</sub> **11**) OOH-FePc(COOH)<sub>4</sub> **12**) H-FePc(COOH)<sub>4</sub> **13**) O-FePc(F)<sub>8</sub> **14**) OH-FePc(F)<sub>8</sub> **15**) OOH-FePc(F)<sub>8</sub> **16**) H-FePc(F)<sub>8</sub> **17**) O-FePc(NH<sub>2</sub>)<sub>8</sub> **18**) OH-FePc(NH<sub>2</sub>)<sub>8</sub> **19**) OOH-FePc(NH<sub>2</sub>)<sub>8</sub> **20**) H-FePc(NH<sub>2</sub>)<sub>8</sub> **21**) O-FePc(COOH)<sub>8</sub> **22**) OH-FePc(COOH)<sub>8</sub> **23**) OOH-FePc(COOH)<sub>8</sub> **24**) H-FePc(COOH)<sub>8</sub>.

**Table S2.** The calculated adsorbed species (\*O, \*OH, \*OOH and \*H) free energy changes ( $\Delta G_{\text{OOH}^*}$ ,  $\Delta G_{\text{O}^*}$ ,  $\Delta G_{\text{OH}^*}$ ,  $\Delta G_{\text{H}^*}$ ), and ORR/OER/HER overpotentials ( $\eta$ ) at C and N-sites (in vacuum).

| Medium | Structures                          | $\Delta G_{\text{OOH}^*}$ | $\Delta G_{\text{O}^*}$ | $\Delta G_{\text{OH}^*}$ | $\Delta G_{\text{H}^*}$ | $\eta^{\text{ORR}}$ | $\eta^{\text{OER}}$ | $\eta^{\text{HER}}$ |
|--------|-------------------------------------|---------------------------|-------------------------|--------------------------|-------------------------|---------------------|---------------------|---------------------|
|        |                                     | (eV)                      | (eV)                    | (eV)                     | (eV)                    | (V)                 | (V)                 | (V)                 |
| C-site | FePc(F) <sub>4</sub>                | 2.71                      | 2.20                    | -0.24                    | -0.58                   | 1.47                | 1.21                | -0.58               |
|        | FePc(F) <sub>8</sub>                | 2.75                      | 2.22                    | -0.23                    | -0.56                   | 1.46                | 1.22                | -0.56               |
|        | FePc(NH <sub>2</sub> ) <sub>4</sub> | 1.00                      | 0.41                    | -1.97                    | -0.63                   | 3.20                | 2.69                | -0.63               |
|        | FePc(NH <sub>2</sub> ) <sub>8</sub> | 2.71                      | 2.12                    | -0.24                    | -0.61                   | 1.47                | 1.13                | -0.61               |
|        | FePc(COOH) <sub>4</sub>             | 2.80                      | 7.79                    | -0.16                    | -0.55                   | 6.22                | 6.72                | -0.55               |
|        | FePc(COOH) <sub>8</sub>             | 2.82                      | 2.35                    | -0.16                    | -0.53                   | 1.39                | 1.28                | -0.53               |
| N-site | FePc(F) <sub>4</sub>                | 3.94                      | 2.33                    | 1.24                     | -0.87                   | 0.25                | 0.38                | -0.87               |
|        | FePc(F) <sub>8</sub>                | 3.95                      | 2.32                    | 1.21                     | -0.86                   | 0.26                | 0.41                | -0.86               |
|        | FePc(NH <sub>2</sub> ) <sub>4</sub> | 1.58                      | 0.62                    | -0.41                    | -0.83                   | 1.64                | 2.11                | -0.83               |
|        | FePc(NH <sub>2</sub> ) <sub>8</sub> | 3.27                      | 2.29                    | 1.31                     | -0.81                   | 0.26                | 0.42                | -0.81               |
|        | FePc(COOH) <sub>4</sub>             | 3.96                      | 2.39                    | 1.26                     | -0.93                   | 0.27                | 0.34                | -0.93               |
|        | FePc(COOH) <sub>8</sub>             | 2.66                      | 2.41                    | 1.19                     | -0.99                   | 0.99                | 1.03                | -0.99               |

A

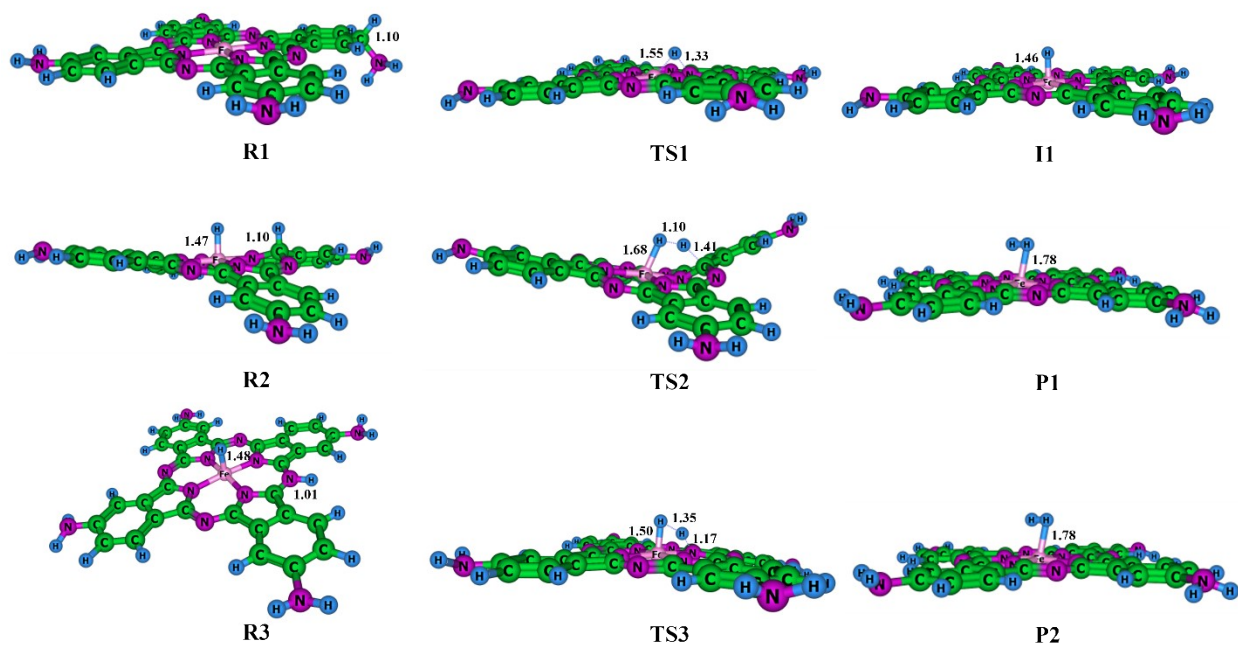

B

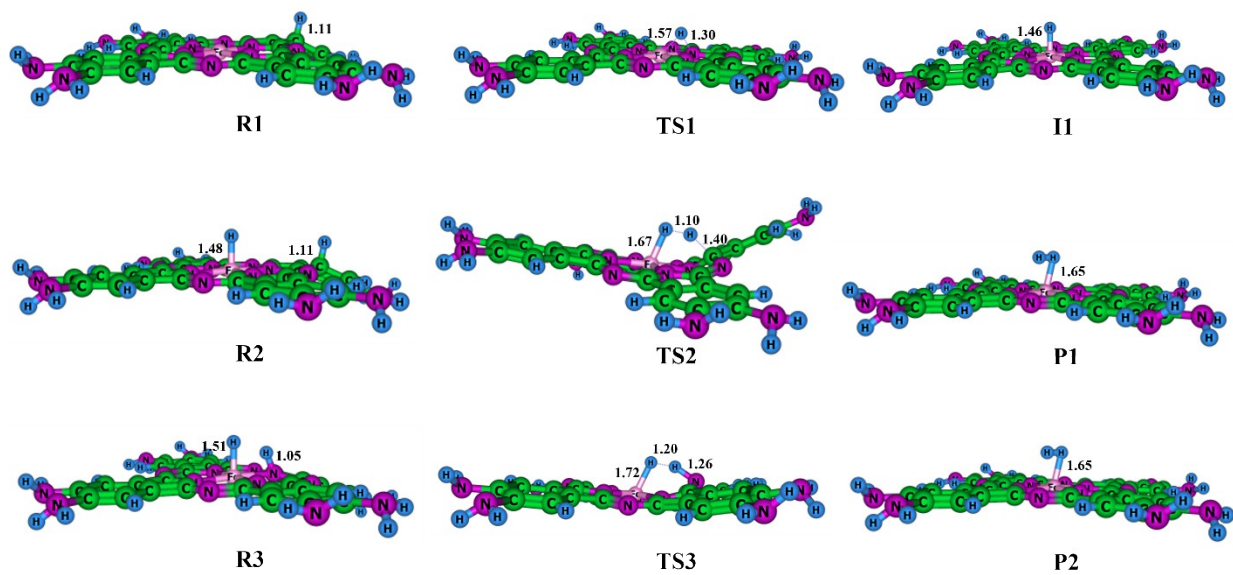

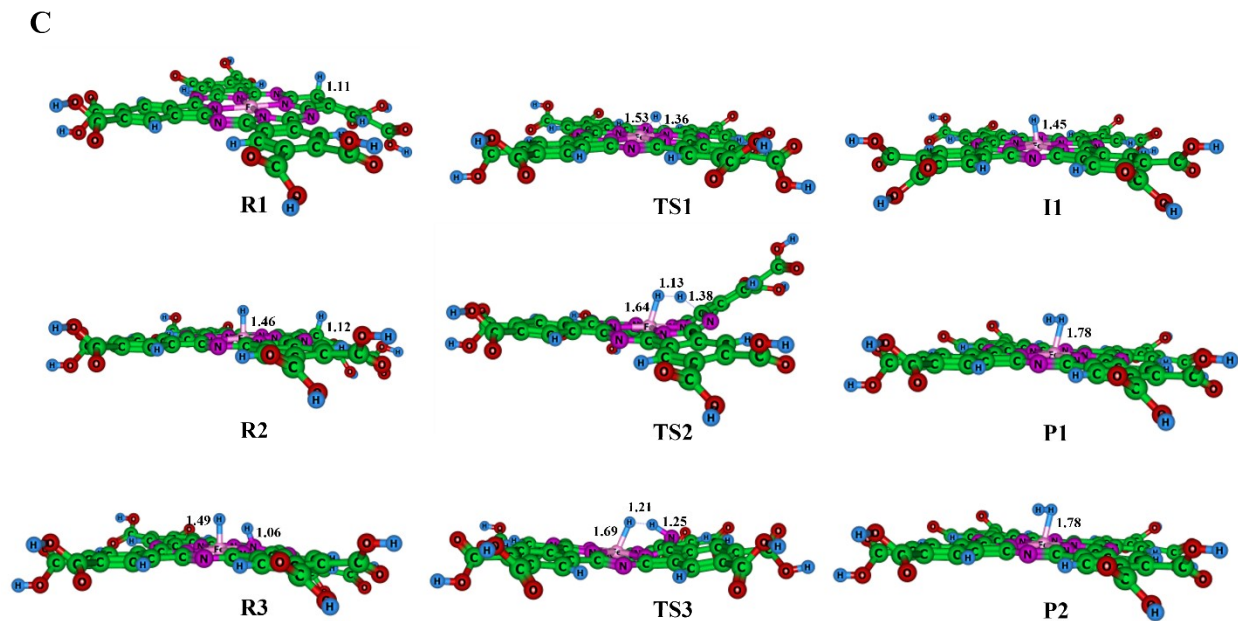

**Fig. S6.** Optimized geometries of reactants (R), intermediates (I), transition states (TS), and final product (P) for **A)**  $\text{FePc}(\text{NH}_2)_4$  **B)**  $\text{FePc}(\text{NH}_2)_8$  and **C)**  $\text{FePc}(\text{COOH})_8$  in the HER mechanism in solvent.
